# Supplementary material for: Release of Endocannabinoids into the Cerebrospinal Fluid during the Induction of the Trigemino-Hypoglossal Reflex in Rats
Source: MDPI journal article supplement (doi:10.3390/cimb44050164), 2022-05-23
Supplement: s1 [file s1]

**Table S1.** Spearman Correlation Coefficients and associated p-values for endocannabinoids (AEA/2-AG) and expression of CB1R/CB2R.

| Pairs of variables                                                                            | Spearman R     | t(N-2)         | p             |
|-----------------------------------------------------------------------------------------------|----------------|----------------|---------------|
| <b>Relative quantity of CB1R mRNA - mesencephalon &amp; AEA concentration [ng/ml] in CSF</b>  | <b>0.5661</b>  | <b>2.7471</b>  | <b>0.0143</b> |
| <b>Relative quantity of CB1R mRNA - mesencephalon &amp; 2-AG concentration [ng/ml] in CSF</b> | <b>-0.6040</b> | <b>-3.0316</b> | <b>0.0079</b> |
| <b>Relative quantity of CB1R mRNA - thalamus &amp; AEA concentration [ng/ml] in CSF</b>       | 0.3696         | 1.5913         | 0.1311        |
| <b>Relative quantity of CB1R mRNA - thalamus &amp; 2-AG concentration [ng/ml] in CSF</b>      | -0.3044        | -1.2784        | 0.2193        |
| <b>Relative quantity of CB1R mRNA - hypothalamus &amp; AEA concentration [ng/ml] in CSF</b>   | <b>0.5658</b>  | <b>2.7450</b>  | <b>0.0144</b> |
| <b>Relative quantity of CB1R mRNA - hypothalamus &amp; 2-AG concentration [ng/ml] in CSF</b>  | -0.2095        | -0.8570        | 0.4041        |
| <b>Relative quantity of CB2R mRNA - mesencephalon &amp; AEA concentration [ng/ml] in CSF</b>  | -0.0073        | -0.0290        | 0.9772        |
| <b>Relative quantity of CB2R mRNA - mesencephalon &amp; 2-AG concentration [ng/ml] in CSF</b> | <b>0.6056</b>  | <b>3.0440</b>  | <b>0.0077</b> |
| <b>Relative quantity of CB2R mRNA - thalamus &amp; AEA concentration [ng/ml] in CSF</b>       | -0.3673        | -1.5794        | 0.1338        |
| <b>Relative quantity of CB2R mRNA - thalamus &amp; 2-AG concentration [ng/ml] in CSF</b>      | 0.2272         | 0.9330         | 0.3647        |
| <b>Relative quantity of CB2R mRNA - hypothalamus &amp; AEA concentration [ng/ml] in CSF</b>   | -0.1829        | -0.7444        | 0.4675        |
| <b>Relative quantity of CB2R mRNA - hypothalamus &amp; 2-AG concentration [ng/ml] in CSF</b>  | 0.2676         | 1.1108         | 0.2831        |
